# Supplementary material
Source: PubMed Central journal article supplement (PMC2754825)
Supplement: NIHMS139415-supplement-Supp_2.pdf [file NIHMS139415-supplement-Supp_2.pdf]

Tsutsumi et al., Supplemental Figure 1

a.

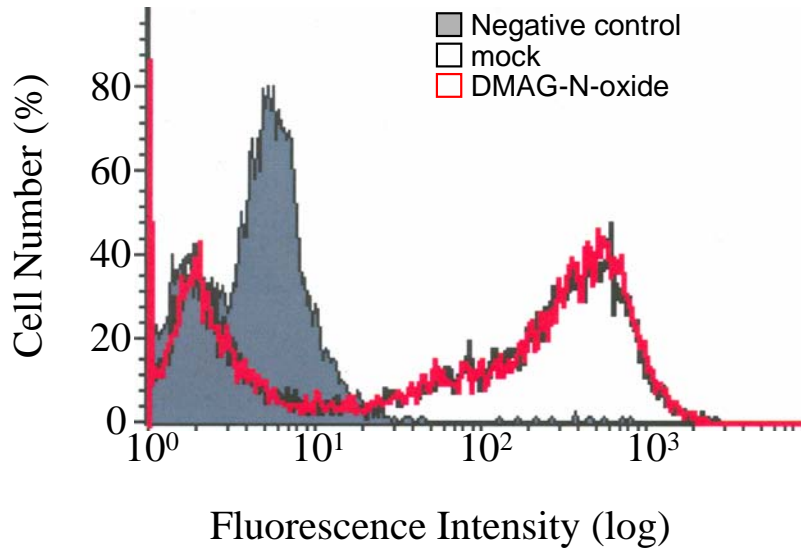

b.

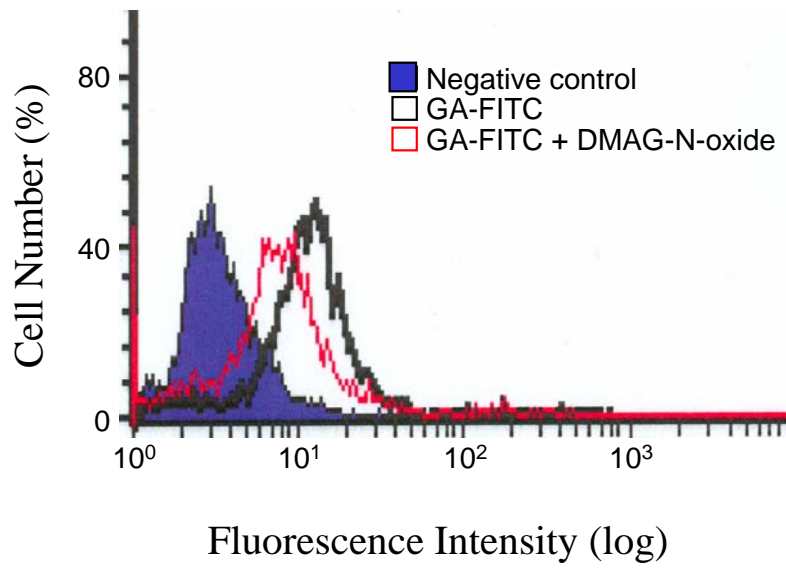

Tsutsumi et al., Supplemental Figure 2

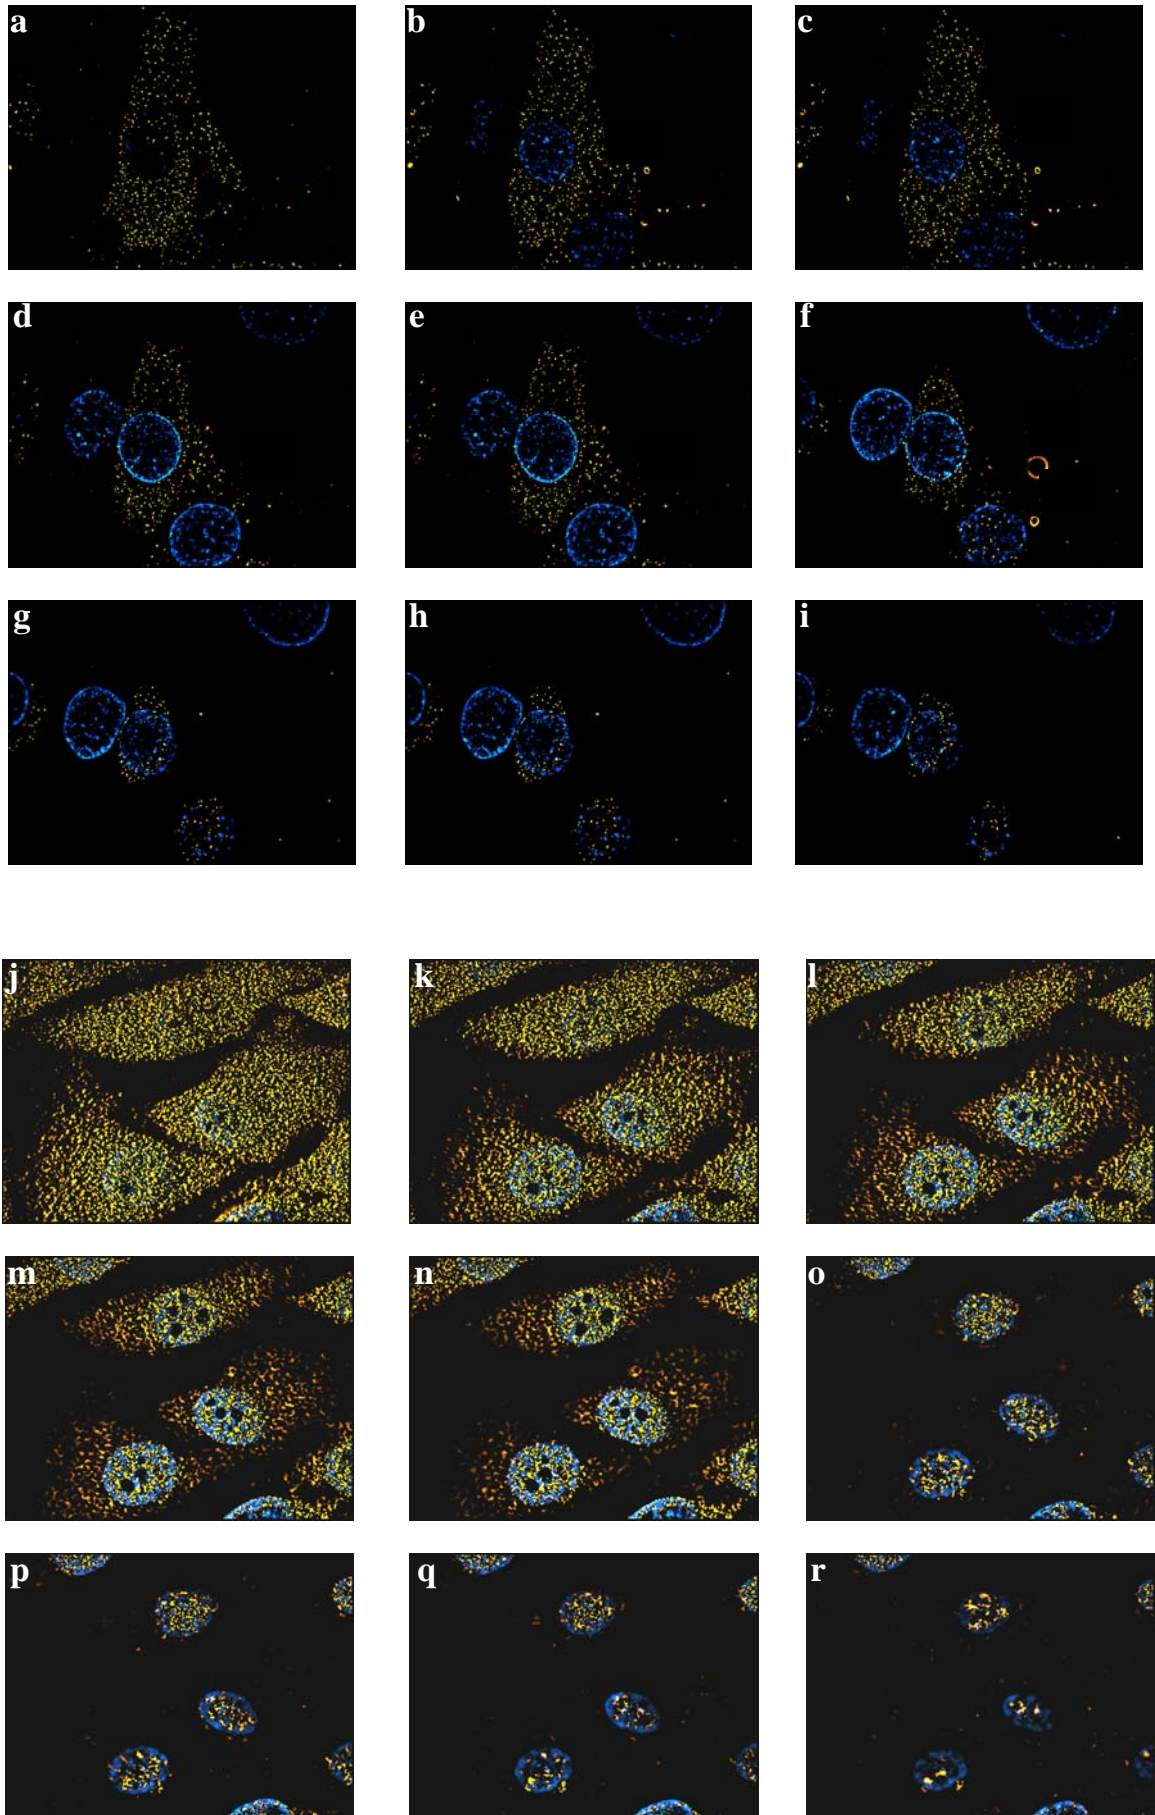

**a**

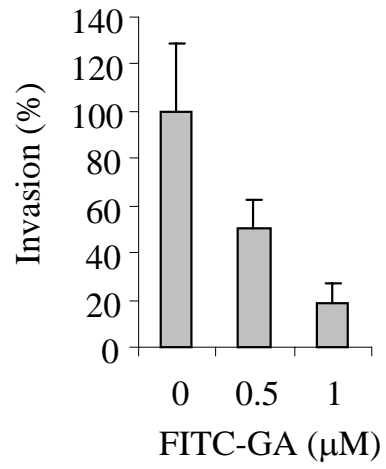

**b**

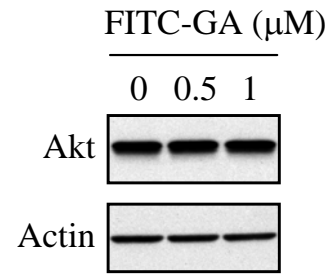

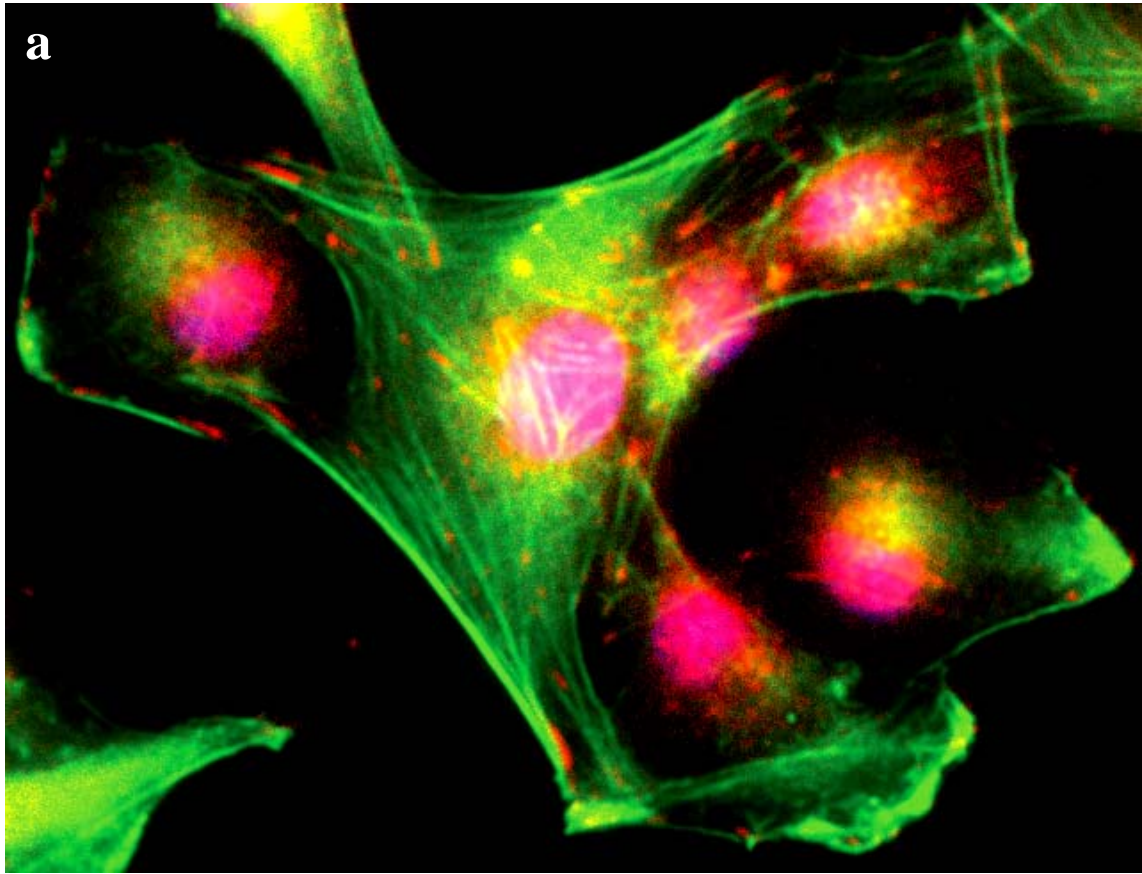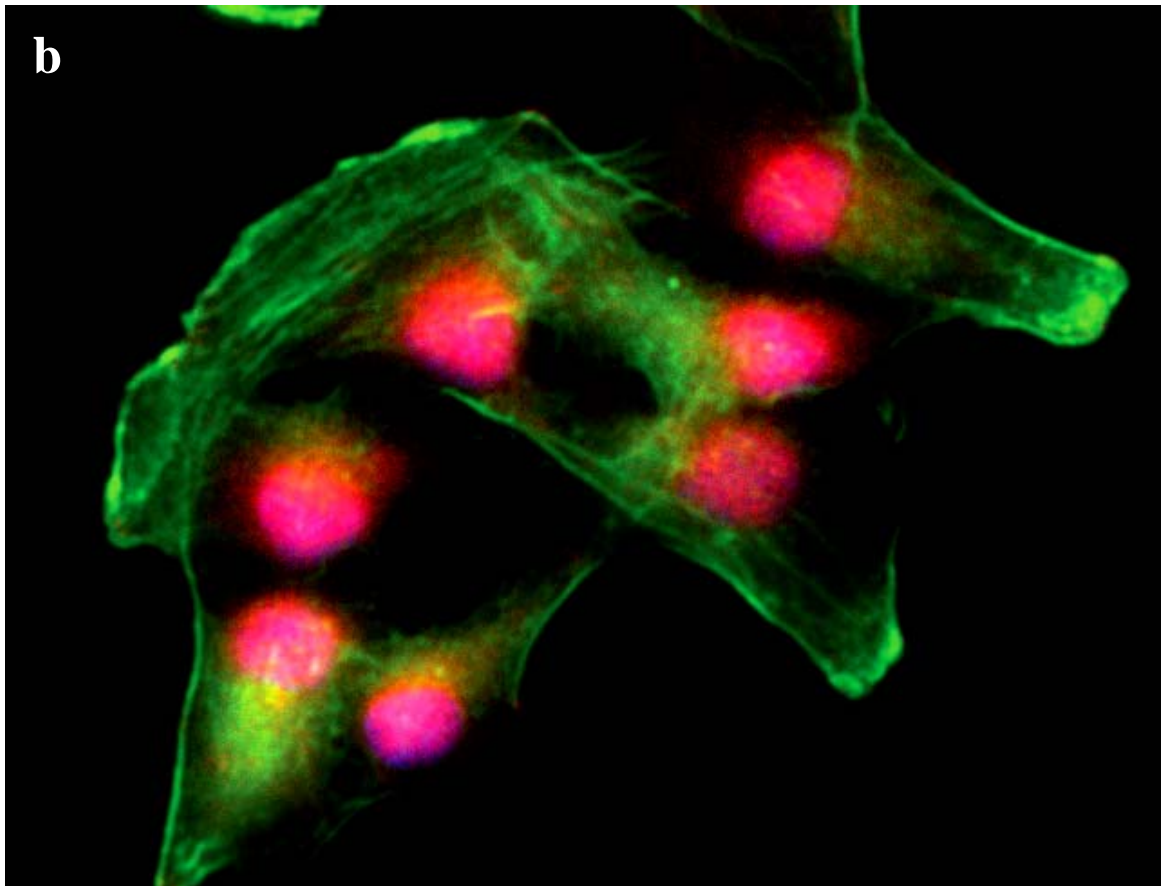

Tsutsumi et al., Supplemental Figure 5

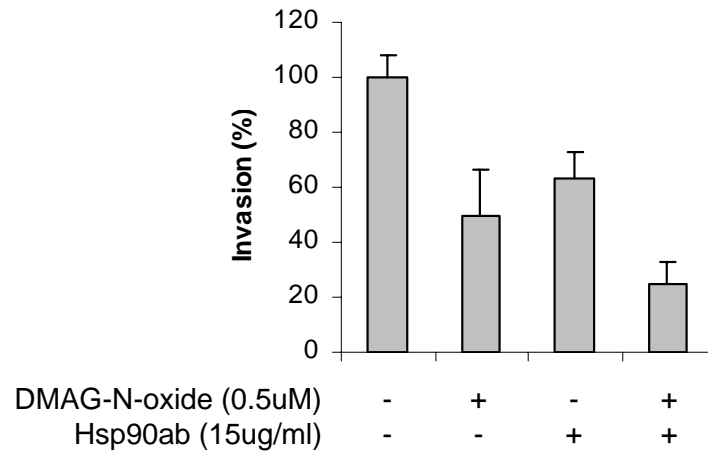

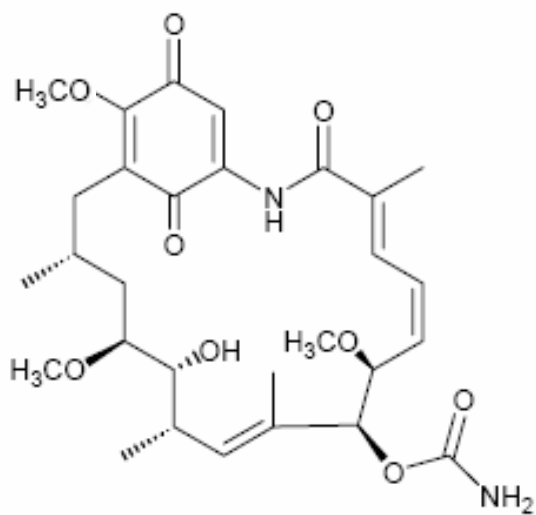

**GA**

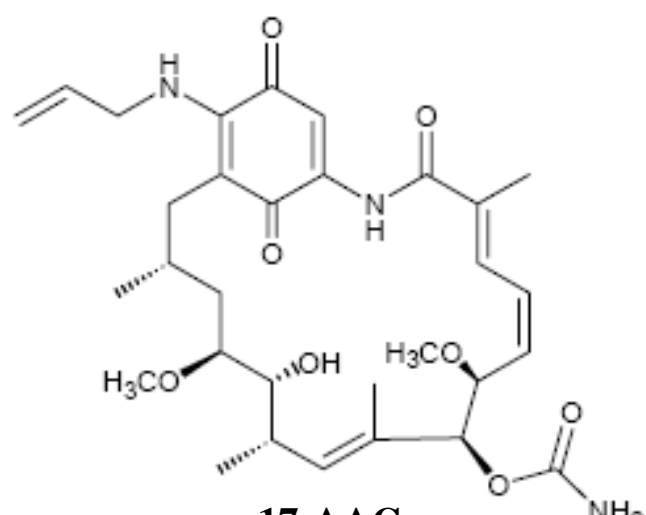

**17-AAG**

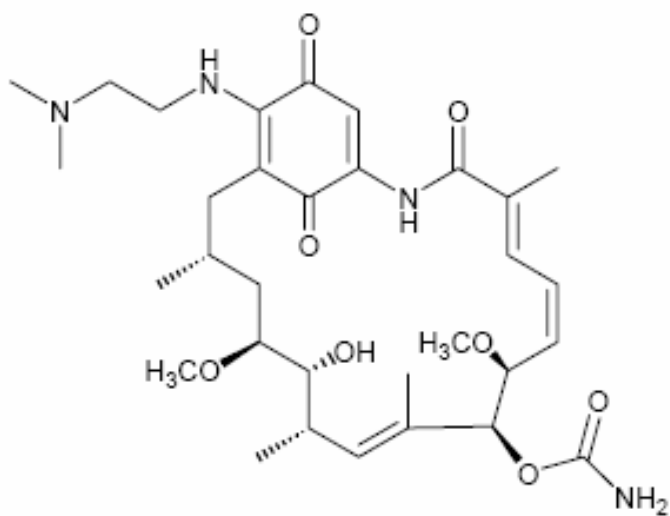

**17-DMAG**

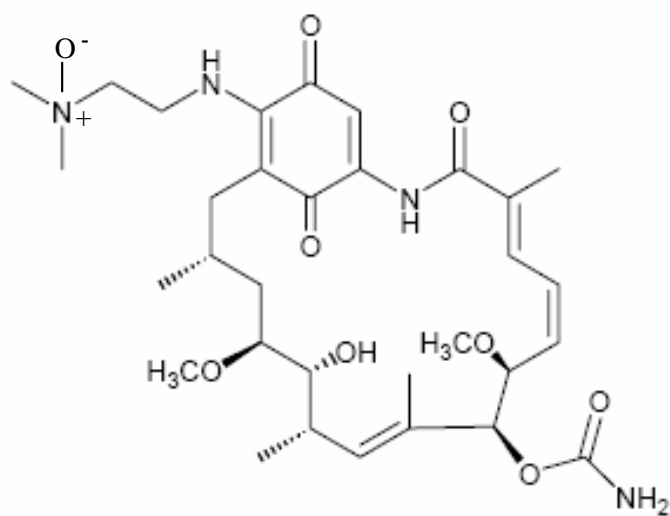

**DMAG-N-oxide**

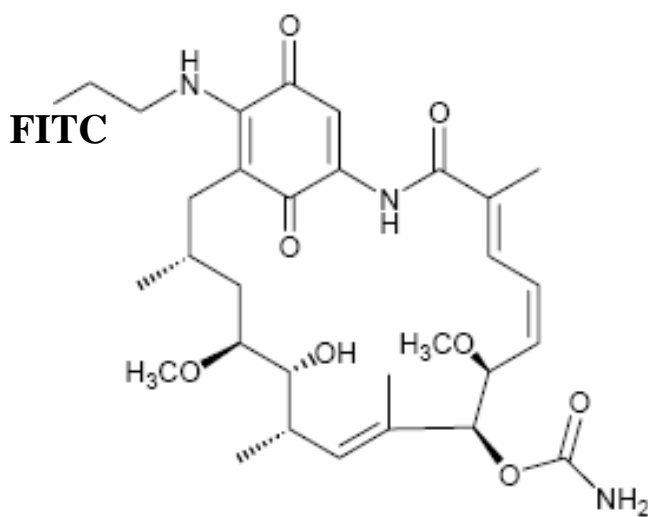

**FITC-GA**
